# Supplementary material for: Structure dependent toxicity of lignin phenolics and PEG detoxification in VHG ethanol fermentation
Source: Royal Society of Chemistry journal article supplement (doi:10.1039/c6ra20693j), 2016-01-01
Supplement: c6ra20693j1.pdf [file c6ra20693j1.pdf]

## Structure dependent toxicity of lignin phenolics and PEG detoxification in VHG ethanol fermentation

Xiumei Liu, Peifang Yan, Wenjuan Xu, and Z. Conrad Zhang\*

State Key Laboratory of Catalysis, Dalian National Laboratory for Clean Energy, Dalian Institute of Chemical Physics, Chinese Academy of Sciences, Dalian 116023, P. R. China. E-mail: zczhang@yahoo.com.

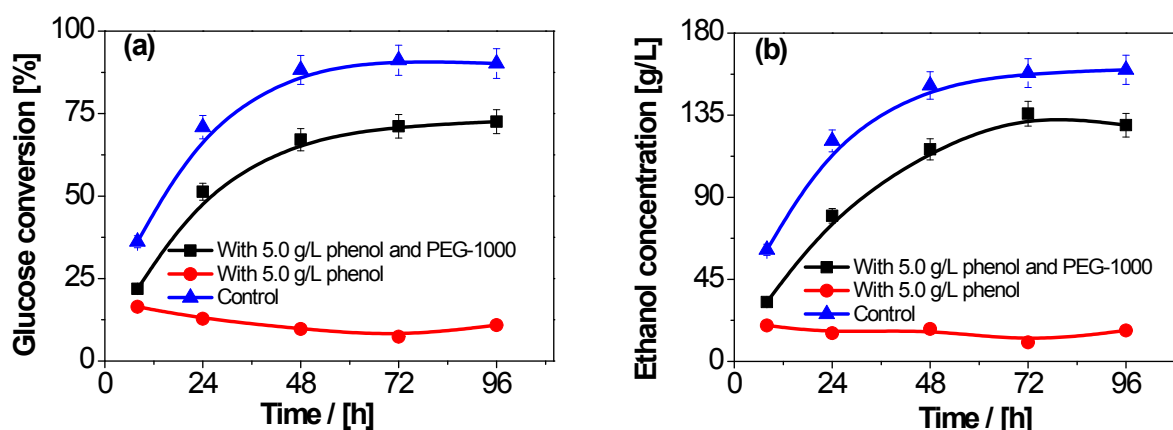

**Fig. S1** The inhibitory effects of 5.0 g/L phenol on glucose conversion, ethanol concentration in the presence and absence of PEG-1000. **(a)** The inhibitory effects of 5.0 g/L phenol on glucose conversion. **(b)** The inhibitory effects of 5.0 g/L phenol on ethanol concentration.

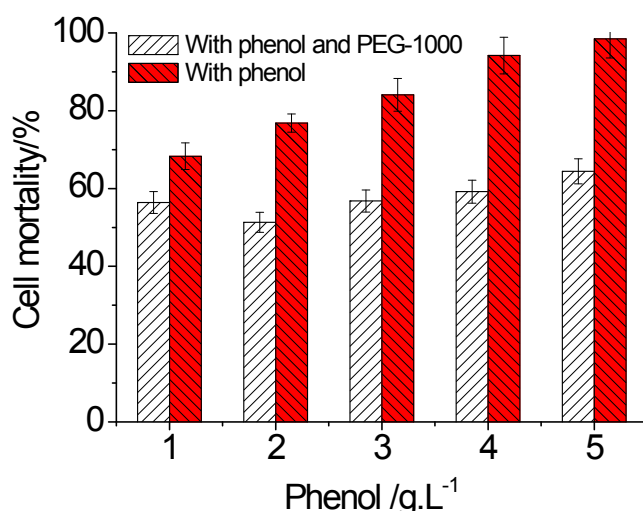

**Fig. S2** Yeast cell mortality with or without PEG-1000 phenol from VHG fermentation at 48h. Fermentation conditions: 398 g/L glucose, approximately  $5 \times 10^8$  cells/mL, 250 g/L of PEG-1000, 33 °C, 160 rpm, and pH of 4.3.

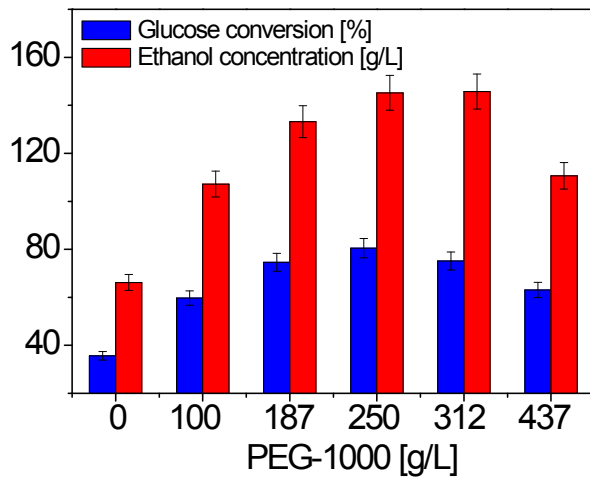

**Fig. S3.** The effect of PEG-1000 concentration on ethanol fermentation. Fermentation conditions: 398 g/L glucose, approximately  $5 \times 10^8$  cells/mL, 5.0 g/L of guaiacol 250 g/L of PEG-1000, 33 °C, 160 rpm, and pH of 4.3.

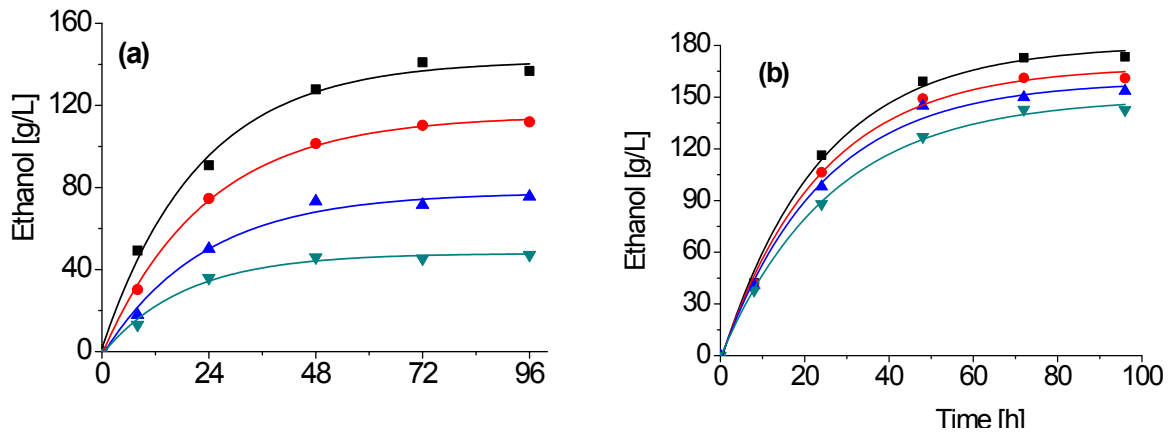

**Fig. S4** Experimental and model profiles of VHG ethanol fermentation with different concentration of phenol. (a) without PEG-1000. (b) with PEG-1000. Fermentation conditions: 400 g glucose, approximately  $5 \times 10^8$  cells/mL, 250 g/L of PEG-1000, 33 °C, 160 rpm, and pH of 4.3. Lines represent model predictions and symbols represent experimental data. ((■), 1.0g/L; (●), 2.0 g/L; (▲), 3.0 g/L; (▼), 4.0 g/L.

Table S1. The estimated the parameters  $P_{max}$  (g/L) (ethanol concentration above which cells do not produce ethanol) and  $v_{max}$  (g. L<sup>-1</sup>. h<sup>-1</sup>) (the highest specific rate of ethanol formation)

| Phenol/g.L <sup>-1</sup> | Pure water      |                                                   | With PEG-1000   |                                                   |
|--------------------------|-----------------|---------------------------------------------------|-----------------|---------------------------------------------------|
|                          | $P_{max}$ [g/L] | $v_{max}$ [g. L <sup>-1</sup> . h <sup>-1</sup> ] | $P_{max}$ [g/L] | $v_{max}$ [g. L <sup>-1</sup> . h <sup>-1</sup> ] |
| 1                        | 143.3           | 6.25                                              | 179.1           | 7.76                                              |
| 2                        | 115.3           | 4.88                                              | 176.1           | 6.45                                              |
| 3                        | 77.90           | 3.31                                              | 159.6           | 6.55                                              |
| 4                        | 42.03           | 2.49                                              | 149.8           | 5.66                                              |
